# Supplementary material for: Educational and Psychological Support Combined with Minimally Invasive Surgery Reduces Perioperative Depression and Anxiety in Patients with Bladder Cancer Treated with Radical Cystectomy.
Source: Research Square preprint supplement (doi:10.21203/rs.3.rs-200853/v1), 2021-02-17
Supplement: Supplementary file 1 [file 5b14d46bed11035bf75139fb.xlsx]

## Sheet: Arkusz1
Table 2. Multivariate analysis of clinical factors associated with borderline or abnormal preoperative feeling of anxiety and depression in HADS.
		anxiety					depression
variables		OR	95% CI	95% CI	p		OR	95% CI	95% CI	p
Age
≤65		Ref.					Ref.
>65		1.379	0.539	3.528	0.503		1.113	0.469	2.643	0.809
Gender
male		Ref.					Ref.
female		2.363	0.586	9.535	0.227		1.005	0.389	2.599	0.991
Marital status
single		Ref.
married		2.000	0.722	5.540	0.182		0.557	0.188	1.652	0.291
Surgical approach
open		Ref.					Ref.
laparoscopic		0.351	0.139	0.884	0.026		0.438	0.177	1.080	0.077
Preoperative meeting
no		Ref.					Ref.
yes		0.444	0.179	1.096	0.078		0.549	0.219	1.376	0.201
